# Supplementary material
Source: publisher figshare collection journal article supplement (https://acs.figshare.com/ndownloader/files/12146549)
Supplement: Supplementary file 1 [file 12146549]

## Supplementary information for:

# Toward upscaled biocatalytic preparation of lactone building blocks for polymer applications

Marie A. F. Delgove, Matthew T. Elford, Katrien V. Bernaerts, and Stefaan M.A.

De Wildeman\*

### List of figures:

**Figure S1.** Kinetics of the biphasic reactions with quantity of substrate and product in mmol as a function of time for a) the aqueous phase of the toluene biphasic system, b) the organic phase of the toluene biphasic system, c) the aqueous phase of the *n*-butyl acetate biphasic system, and d) the organic phase of the *n*-butyl acetate biphasic system.

**Figure S2.** Picture of the up-scaled reaction set-up (500 mL).

**Figure S3.** Composition of the isolated products adsorbed on the denatured protein of the 500 mL-scale reaction with ketone substrate **1** at 7.42 min (11.7 %), lactone **1b** at 11.16 min (35.4 %), lactone **1a** at 11.36 min (48.8 %), and the methyl esters **1a'** and **1b'** at 11.74 min (4.1 %).

**Figure S4.** HSQC spectrum of the isolated products from the upscaled reaction (500 mL), containing the targeted lactone products **1a** and **1b** with the corresponding methyl ester ring opened products **1a'** and **1b'**.

**Figure S5.** Kinetics of the formation of the methyl ester **1a'** and **1b'** after dilution with methanol (50 % v v<sup>-1</sup>) of the model reaction containing the chemically synthesized lactones **1a** and **1b** in buffer. The percentage of methyl esters was calculated from GC-FID analysis.

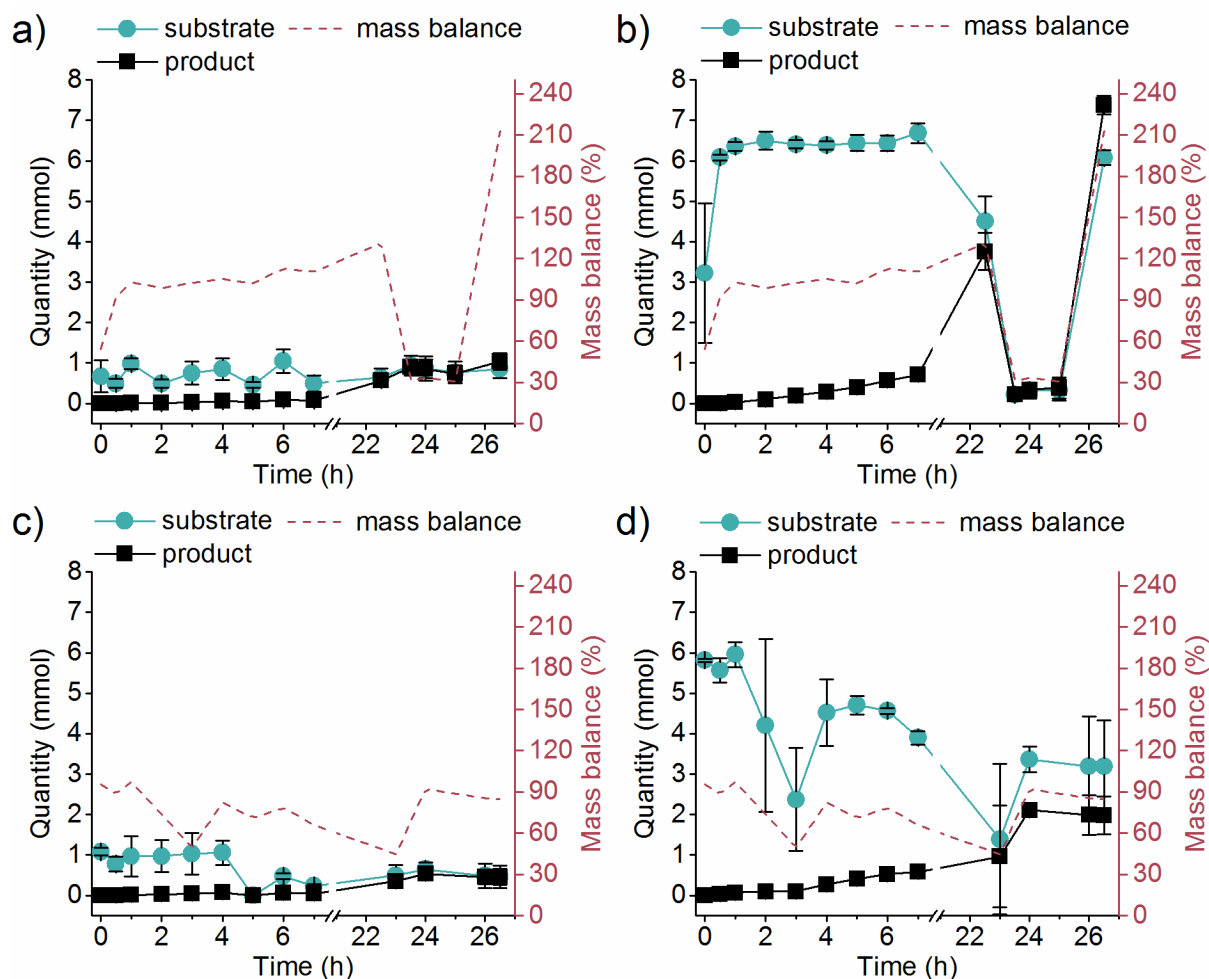

**Figure S1.** Kinetics of the biphasic reactions with quantity of substrate and product in mmol as a function of time for a) the aqueous phase of the toluene biphasic system, b) the organic phase of the toluene biphasic system, c) the aqueous phase of the *n*-butyl acetate biphasic system, and d) the organic phase of the *n*-butyl acetate biphasic system. The mass balance is shown in dotted red line (right axis), calculated as  $(n_{\text{sub, aq}} + n_{\text{sub, org}} + n_{\text{prod, aq}} + n_{\text{prod, org}}) / n_{\text{sub, initial}} \times 100$ , with  $n_{\text{sub, initial}} = 7.2$  mmol. Reaction condition: 7.2 mmol of substrate, 5 % v v<sup>-1</sup> TmCHMO, [GDH] = 0.1 mg mL<sup>-1</sup>, [NADP<sup>+</sup>] = 250 μM, [glucose] = 375 mM, 30 mL aqueous phase + 10 mL organic phase (toluene or *n*-butyl acetate), 250 rpm, air flow 8 mL min<sup>-1</sup>.

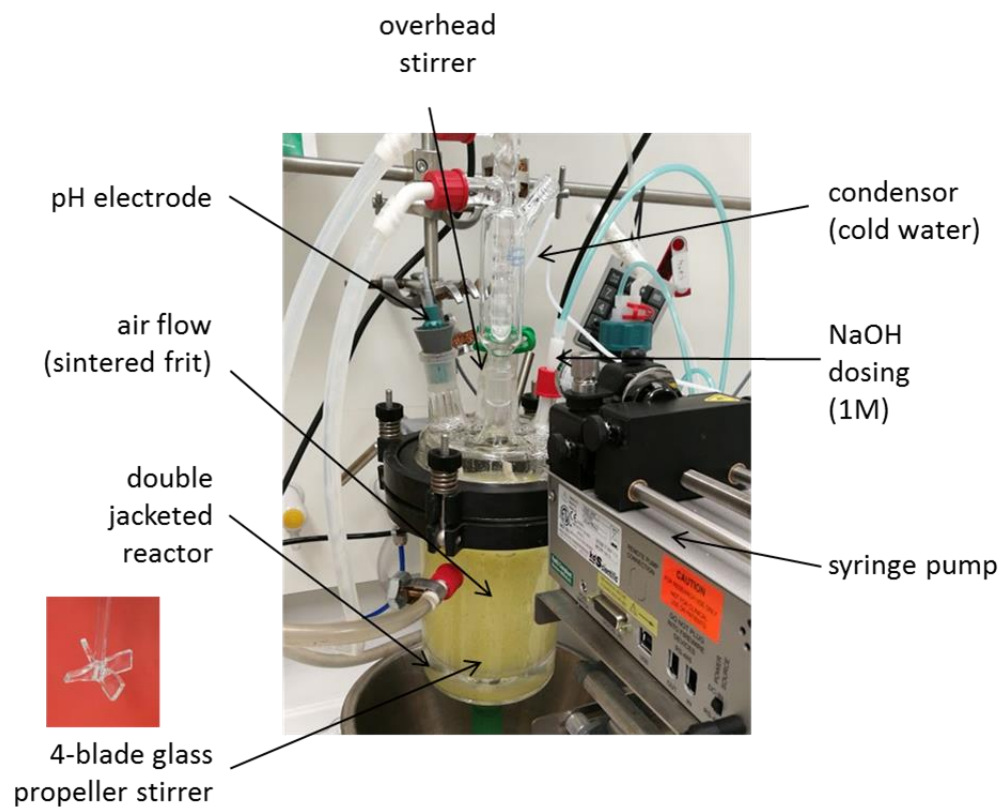

**Figure S2.** Picture of the up-scaled reaction set-up (500 mL).

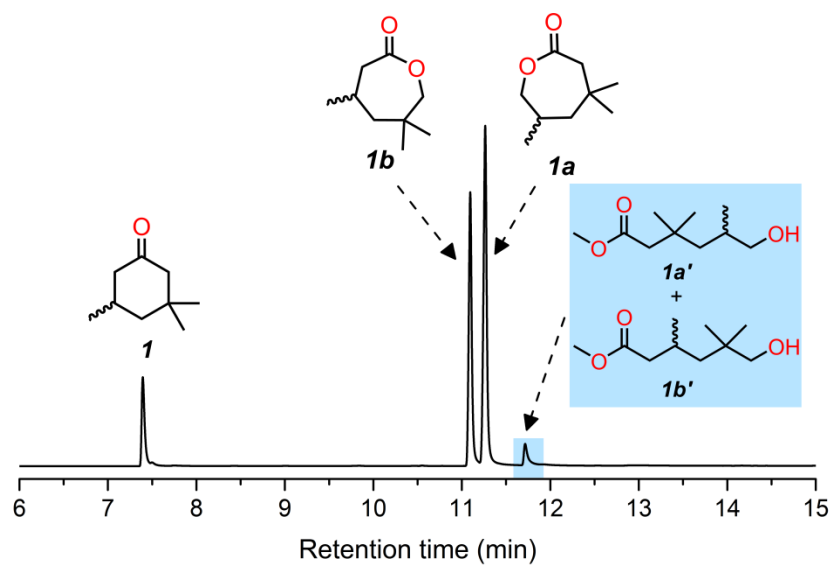

**Figure S3.** Composition of the isolated products adsorbed on the denatured protein of the 500 mL-scale reaction with ketone substrate **1** at 7.42 min (11.7 %), lactone **1b** at 11.16 min (35.4 %), lactone **1a** at 11.36 min (48.8 %), and the methyl esters **1a'** and **1b'** at 11.74 min (4.1 %).

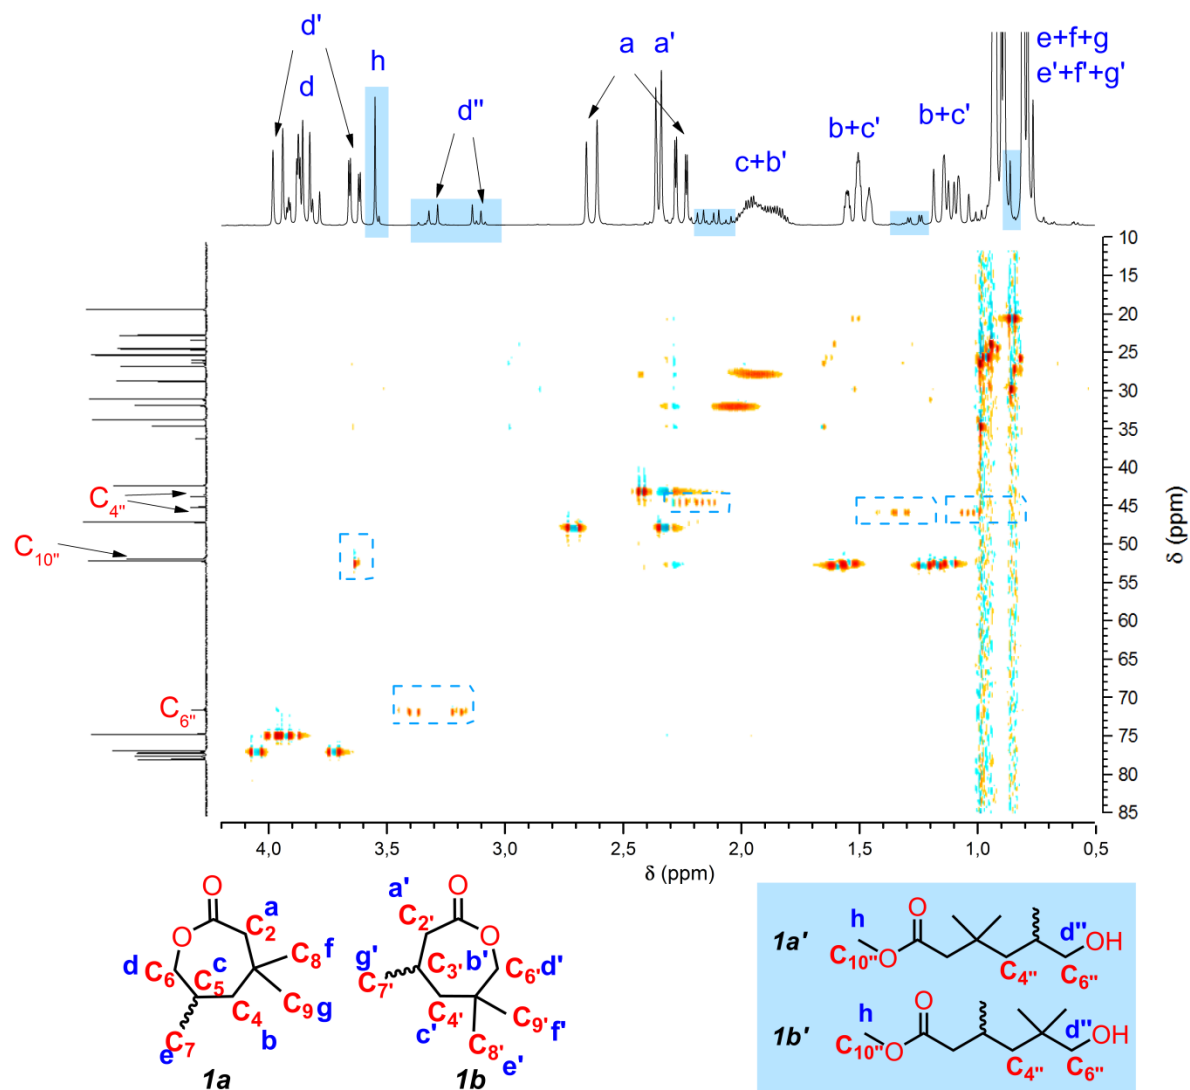

**Figure S4.** HSQC spectrum of the isolated products from the upscaled reaction (500 mL), containing the targeted lactone products **1a** and **1b** with the corresponding methyl ester ring opened products **1a'** and **1b'** (proton of the methyl esters ring opened products highlighted in blue).

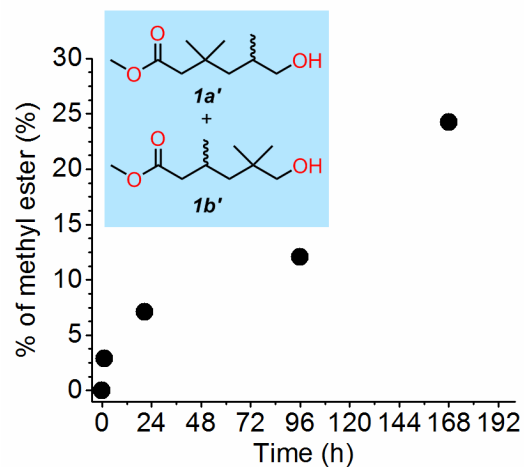

**Figure S5.** Kinetics of the formation of the methyl ester **1a'** and **1b'** after dilution with methanol (50 % v v<sup>-1</sup>) of the model reaction containing the chemically synthesized lactones **1a** and **1b** in buffer. The percentage of methyl esters was calculated from GC-FID analysis.
